# Supplementary material for: Plant growth promoting N-alkyltropinium bromides enhance seed germination, biomass accumulation and photosynthesis parameters of maize (Zea mays)
Source: Royal Society of Chemistry journal article supplement (doi:10.1039/c8nj06298f), 2019-01-01
Supplement: c8nj06298f1.pdf [file c8nj06298f1.pdf]

## New Journal of Chemistry

# Plant growth promoting N-alkyltropinium bromides enhance seed germination, biomass accumulation and photosynthesis parameters of maize (*Zea mays*)

Anna Parus,<sup>\*a</sup> Grzegorz Framski,<sup>\*b</sup> Wojciech Rypniewski,<sup>b</sup> Katarzyna Pansniewicz,<sup>c</sup> Piotr Szulc,<sup>c</sup> Kamila Myszka,<sup>d</sup> Agnieszka Zgoła-Grześkowiak,<sup>a</sup> Łukasz Ławniczak<sup>a</sup> and Łukasz Chrzanowski<sup>a</sup>

## 1. NMR spectra of the synthesized compounds

*N-ethylacetyltropinium bromide (QTS Ethy)* (m.p. 195°C); <sup>1</sup>H NMR (400 MHz, DMSO-d<sub>6</sub>): δ ppm = 1.26 (t, *J*=7.09 Hz, 3H CH<sub>3</sub>-CH<sub>2</sub>-OOC-), 1.84 (d, *J*=16.38 Hz, 4H, CH<sub>2</sub>-CH-N<sup>+</sup>), 2.21 – 2.30 (m, 4H, CH<sub>2</sub>-CH-N<sup>+</sup>), 2.44 (d, *J*=8.07 Hz, 4H, CH<sub>2</sub>-CH-OH), 3.17 (s, 3H, CH<sub>3</sub>-N<sup>+</sup>), 3.92 (br.s, 1H, CH-OH), 4.16 (br.s, 2H, CH-N<sup>+</sup>), 4.24 (q, *J*=7.25 Hz, 2H, CH<sub>3</sub>-CH<sub>2</sub>-OOC-), 4.31 (s, 2H, -OOC-CH<sub>2</sub>-N<sup>+</sup>), 5.03 (s, 1H, CH-OH); <sup>13</sup>C NMR (DMSO-d<sub>6</sub>, 100 MHz): δ ppm = 13.79, 24.32, 34.02, 39.30, 39.72, 58.63, 58.71, 58.71, 61.99, 67.26, 165.27

*N-benzyltropinium bromide (QTS Benz)* (m.p. 243-245°C); <sup>1</sup>H NMR (400 MHz, DMSO-d<sub>6</sub>): δ ppm = 1.83 (d, *J*=16.14 Hz, 4H CH<sub>2</sub>-CH-N<sup>+</sup>), 2.30 – 2.243 (m, 4H, CH<sub>2</sub>-CH-OH), 2.88 (br.s, 3H, N<sup>+</sup>-CH<sub>3</sub>), 3.81 (s, 2H, CH-N<sup>+</sup>), 3.92 (s, 1H, CH-OH), 4.48 (s, 2H, Ph-CH<sub>2</sub>-N<sup>+</sup>), 5.02 (d, *J*=2.45 Hz, 1H, CH-OH), 7.53 (m, 5H, Ph); <sup>13</sup>C NMR (DMSO-d<sub>6</sub>, 100 MHz): δ ppm = 24.32, 34.02, 39.30, 39.72, 54.00, 58.63, 58.71, 58.71, 61.99, 128.40, 129.20, 137.80

*N-decanyltropinium bromide (QTS C10)* (m.p. 215-216°C); <sup>1</sup>H NMR (400 MHz, DMSO-d<sub>6</sub>): δ ppm = 0.77 – 0.91 (m, 3H, CH<sub>3</sub>-CH<sub>2</sub>), 1.17 – 1.33 (m, 16H, -CH<sub>2</sub>-), 1.65 (br.s, 2H, CH<sub>2</sub>-CH-N<sup>+</sup>), 1.79 (d, *J*=16.14 Hz, 4H, CH<sub>2</sub>-CH-N<sup>+</sup>), 2.21 (br.s., 2H, CH<sub>2</sub>-CH-N<sup>+</sup>), 2.33 – 2.45 (m, 4H, CH<sub>2</sub>-CH-OH), 2.91 – 3.02 (m, 3H, N<sup>+</sup>-CH<sub>3</sub>), 3.11 – 3.21 (m, 2H, -CH<sub>2</sub>-CH<sub>2</sub>-N<sup>+</sup>), 3.82 (br.s, 2H, CH-N<sup>+</sup>), 3.92 (br.s, 1H, CH-OH), 4.97 (br.s., 1H, CH-OH); <sup>13</sup>C NMR (DMSO-d<sub>6</sub>, 100 MHz): δ ppm = 13.95, 21.65, 22.08, 24.68, 25.92, 28.60, 28.90, 31.26, 31.26, 34.33, 34.33, 39.11, 39.74, 59.00, 60.27, 60.27, 65.42.

*N-dodecyltropinium bromide (QTS C12)* (m.p. 228-229°C); <sup>1</sup>H NMR (400 MHz, DMSO-d<sub>6</sub>): δ ppm = 0.86 (t, *J*=6.60 Hz, 3H, CH<sub>3</sub>-CH<sub>2</sub>), 1.25 (m, 20 H, -CH<sub>2</sub>-), 1.65 (br.s, 2H, CH<sub>2</sub>-CH-N<sup>+</sup>), 1.79 (d, *J*=16.14 Hz, 4H, CH<sub>2</sub>-CH-N<sup>+</sup>), 2.08-2.24 (m, 2H, CH<sub>2</sub>-CH-N<sup>+</sup>), 2.31 – 2.45 (m, 4H, CH<sub>2</sub>-CH-OH), 2.98 (s, 3H, N<sup>+</sup>-CH<sub>3</sub>), 3.10 – 3.23 (m, 2H, -CH<sub>2</sub>-CH<sub>2</sub>-N<sup>+</sup>), 3.82 (br.s, 2H, CH-N<sup>+</sup>), 3.92 (br.s, 1H, CH-OH), 4.97 (br.s., 1H, CH-OH); <sup>13</sup>C NMR (DMSO-d<sub>6</sub>, 100 MHz): δ ppm = 14.39, 22.07, 22.52, 25.12, 26.35, 29.03, 29.13, 29.26, 29.37, 29.42, 29.45, 31.72, 34.78, 39.35, 39.55, 39.76, 39.98, 40.18, 40.39, 40.59, 59.44, 60.73, 65.87, 66.44.

*N-tetradecyltropinium bromide (QTS C14)* (m.p. 244-245°C); <sup>1</sup>H NMR (400 MHz, DMSO-d<sub>6</sub>): δ ppm = 0.86 (t, *J*=6.60 Hz, 3H, CH<sub>3</sub>-CH<sub>2</sub>), 1.19 – 1.34 (m, 24H, -CH<sub>2</sub>-), 1.65 (br.s, 2H, CH<sub>2</sub>-CH-N<sup>+</sup>), 1.79 (d, *J*=15.89 Hz, 4H, CH<sub>2</sub>-CH-N<sup>+</sup>), 2.14 – 2.23 (m, 2H, CH<sub>2</sub>-CH-N<sup>+</sup>), 2.37 (d, 4H, CH<sub>2</sub>-CH-OH), 2.96 (m, 3H, N<sup>+</sup>-CH<sub>3</sub>), 3.15 (m, 2H, -CH<sub>2</sub>-CH<sub>2</sub>-N<sup>+</sup>), 3.81 (br.s, 2H, CH-N<sup>+</sup>), 3.92 (br.s, 1H, CH-OH), 4.97 (s., 1H, CH-OH); <sup>13</sup>C NMR (DMSO-d<sub>6</sub>, 100 MHz): δ ppm = 14.40, 22.10, 22.58, 25.16, 26.39, 29.09, 29.15, 29.30, 29.41, 29.43, 29.50, 31.74, 34.80, 39.52, 39.89, 40.10, 40.11, 40.19, 40.27, 40.35, 59.50, 65.90.

*N-hexadecyltropinium bromide (QTS C16)* (m.p. 241-242°C); <sup>1</sup>H NMR (400 MHz, DMSO-d<sub>6</sub>): δ ppm = 0.85 (t, *J*=6.72 Hz, 3H, CH<sub>3</sub>-CH<sub>2</sub>), 1.24 (s, 28H, -CH<sub>2</sub>-), 1.65 (br.s, 2H, CH<sub>2</sub>-CH-N<sup>+</sup>), 1.79 (d, *J*=15.89 Hz, 4H, CH<sub>2</sub>-CH-N<sup>+</sup>), 2.20 (d, *J*=5.14 Hz, 2H, CH<sub>2</sub>-CH-N<sup>+</sup>), 2.32-2.45 (m, 4H, CH<sub>2</sub>-CH-OH), 2.98 (s, 3H, N<sup>+</sup>-CH<sub>3</sub>), 3.11- 3.20 (m, 2H, -CH<sub>2</sub>-CH<sub>2</sub>-N<sup>+</sup>), 3.82 (br.s, 2H, CH-N<sup>+</sup>), 3.92 (br.s, 1H, CH-OH), 4.97 (s., 1H, CH-OH); <sup>13</sup>C NMR (DMSO-d<sub>6</sub>, 100 MHz): δ ppm = 14.44, 22.13, 22.58, 25.17, 26.40, 29.09, 29.18, 29.32, 29.43, 29.49, 29.53, 31.78, 34.83, 39.52, 39.69, 39.86, 40.02, 40.11, 40.19, 40.28, 40.35, 40.44, 40.52, 59.50, 60.79, 65.92.

*N-octadecyltropinium bromide (QTS C18)* (m.p. 238-239°C); <sup>1</sup>H NMR (400 MHz, DMSO-d<sub>6</sub>): δ ppm = 0.85 (t, *J*=6.60 Hz, 3H, CH<sub>3</sub>-CH<sub>2</sub>), 1.24 (s, 32H, -CH<sub>2</sub>-), 1.65 (br.s, 2H, CH<sub>2</sub>-CH-N<sup>+</sup>), 1.79 (d, *J*=15.89 Hz, 4H, CH<sub>2</sub>-CH-N<sup>+</sup>), 2.20 (d, *J*=5.38 Hz, 2H, CH<sub>2</sub>-CH-N<sup>+</sup>), 2.30-2.45 (m, 4H, CH<sub>2</sub>-CH-OH), 2.98 (s, 3H, N<sup>+</sup>-CH<sub>3</sub>), 3.10- 3.21 (m, 2H, -CH<sub>2</sub>-CH<sub>2</sub>-N<sup>+</sup>), 3.82 (br.s, 2H, CH-N<sup>+</sup>), 3.92 (br.s, 1H, CH-OH), 4.96 (s., 1H, CH-OH); <sup>13</sup>C NMR (DMSO-d<sub>6</sub>, 100 MHz): δ ppm = 14.44, 22.58, 25.17, 29.09, 29.18, 29.31, 29.43, 29.52, 31.77, 34.84, 39.52, 39.68, 39.85, 40.02, 40.19, 40.27, 40.35, 40.43, 40.52, 59.50, 65.94.

## 2. Crystallographic parameters of the synthesized compounds

Table S1. Crystallographic data.

| Compound                | QTS Benz      | QTS C10            | QTS Ethy           |
|-------------------------|---------------|--------------------|--------------------|
| Space group             | Pbca          | P2 <sub>1</sub> /c | P2 <sub>1</sub> /c |
| Z                       | 8             | 4                  | 4                  |
| <i>a</i> [Å]            | 9.788(1)      | 25.460(1)          | 14.081(1)          |
| <i>b</i> [Å]            | 9.698(1)      | 9.951(1)           | 10.117(1)          |
| <i>c</i> [Å]            | 29.266(1)     | 9.9512(10)         | 9.705(1)           |
| $\beta$ [°]             | 90.0          | 101.16             | 107.67             |
| R <sub>int</sub>        | 0.057 (0.082) | 0.114 (0.204)      | 0.071 (0.119)      |
| Resolution [Å]          | 0.78          | 0.80               | 0.81               |
| Wavelength [Å]          | 0.82650       | 0.8950             | 0.88561            |
| I/ $\sigma$ (I)         | 57 (32)       | 37 (8)             | 42 (23)            |
| % completeness          | 95.2 (90.4)   | 90.7 (82.2)        | 94.8 (90.6)        |
| Av. data redundancy     | 12.8 (12.2)   | 6.3 (5.4)          | 6.5 (5.4)          |
| Independent reflections | 2944          | 4600               | 2475               |
| R-factor                | 0.0302        | 0.0637             | 0.0345             |
| CCDC deposition number  | 1872985       | 1872984            | 1872986            |

\* Values in brackets are for the highest resolution shell.

### 3. MS spectra

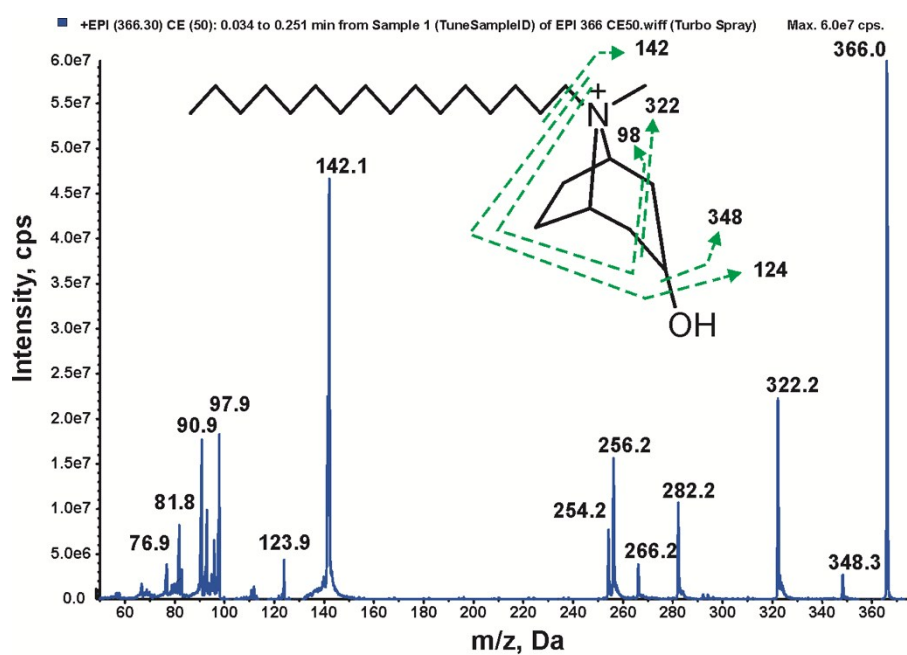

Fig. S1. MS spectrum of QTS-C16.

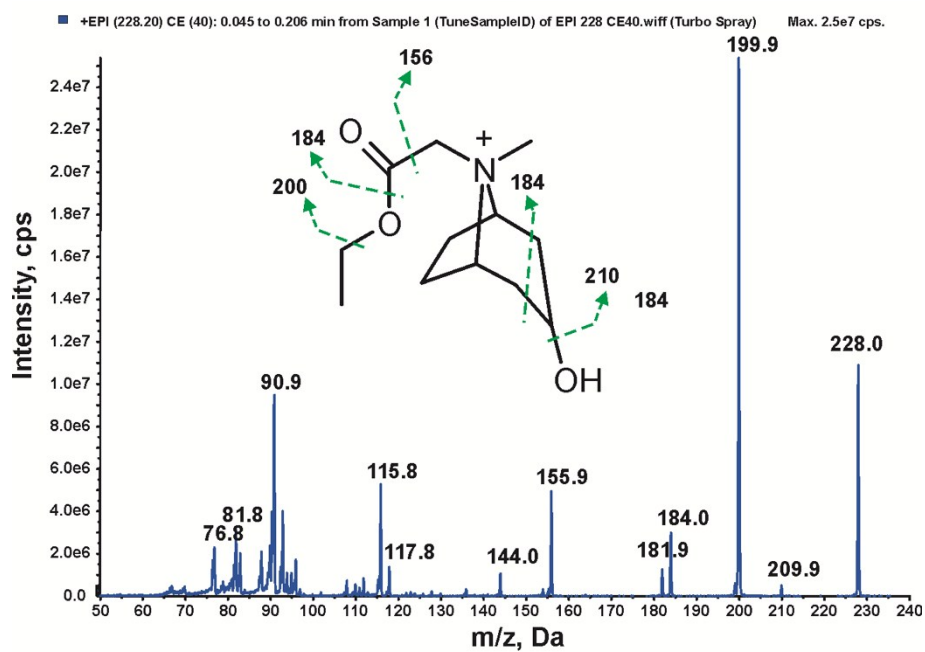

Fig. S2. MS spectrum of QTS-Ethy.

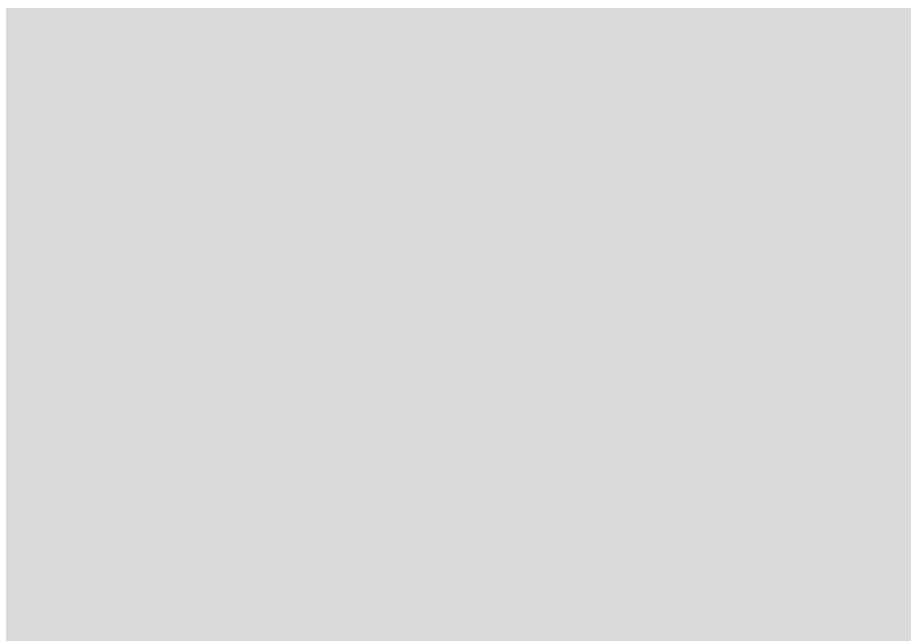

Fig. S3. MS spectrum of QTS-Benz.
